# Supplementary material
Source: Copernicus journal article supplement (doi:10.5194/egusphere-2026-2870)
Supplement: Supplementary file 1 [file egusphere-2026-2870-supplement.pdf]

1  
2  
3  
4  
5  
6  
7  
8  
9

## Supplementary Material

### Quantifying the Near-term Response of the Ocean CO<sub>2</sub> Sink to Emissions Mitigation

Amanda R. Fay<sup>1</sup>, Dustin Carroll<sup>2,3</sup>, Galen A. McKinley<sup>1</sup>, Nicole S. Lovenduski<sup>4</sup>, Dimitris Menemenlis<sup>2</sup>, Hong Zhang<sup>3</sup>

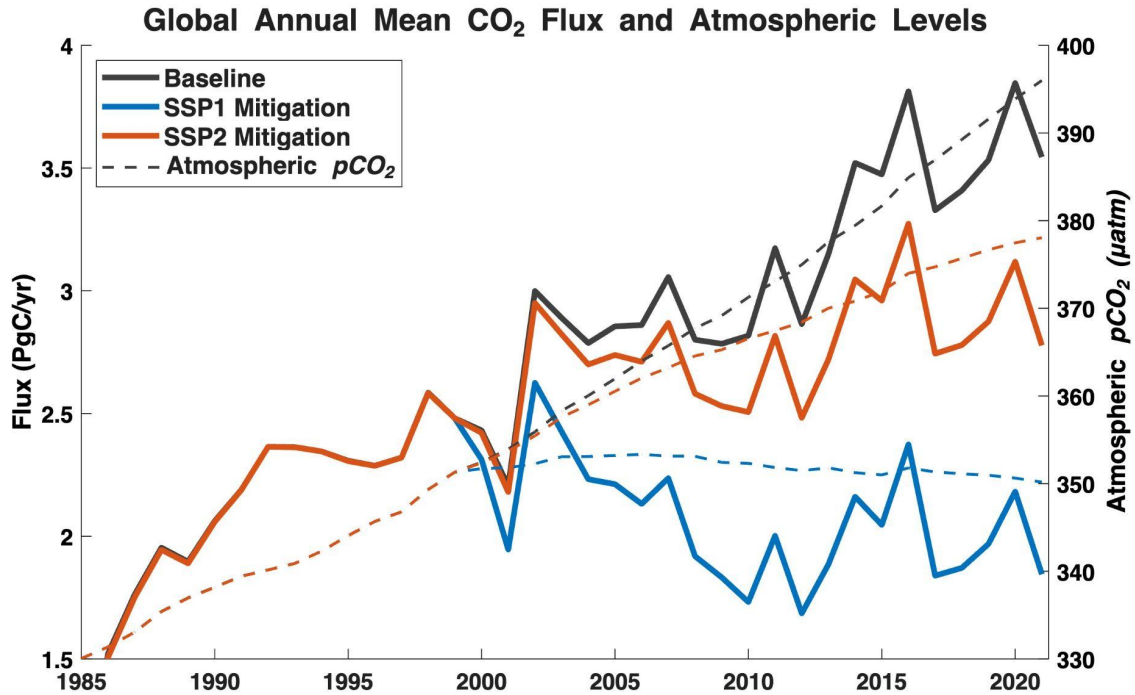

10  
11  
12  
13  
14  
15

**Figure S1:** Annual-mean time series of air-sea CO<sub>2</sub> flux (solid lines) and atmospheric pCO<sub>2</sub> (dashed lines) for baseline and SSP mitigation simulations. Air-sea CO<sub>2</sub> flux is globally integrated, and atmospheric pCO<sub>2</sub> represents a global mean. Full time series presented here; SSP scenario forcing is applied in January 2000. Positive flux represents ocean uptake.

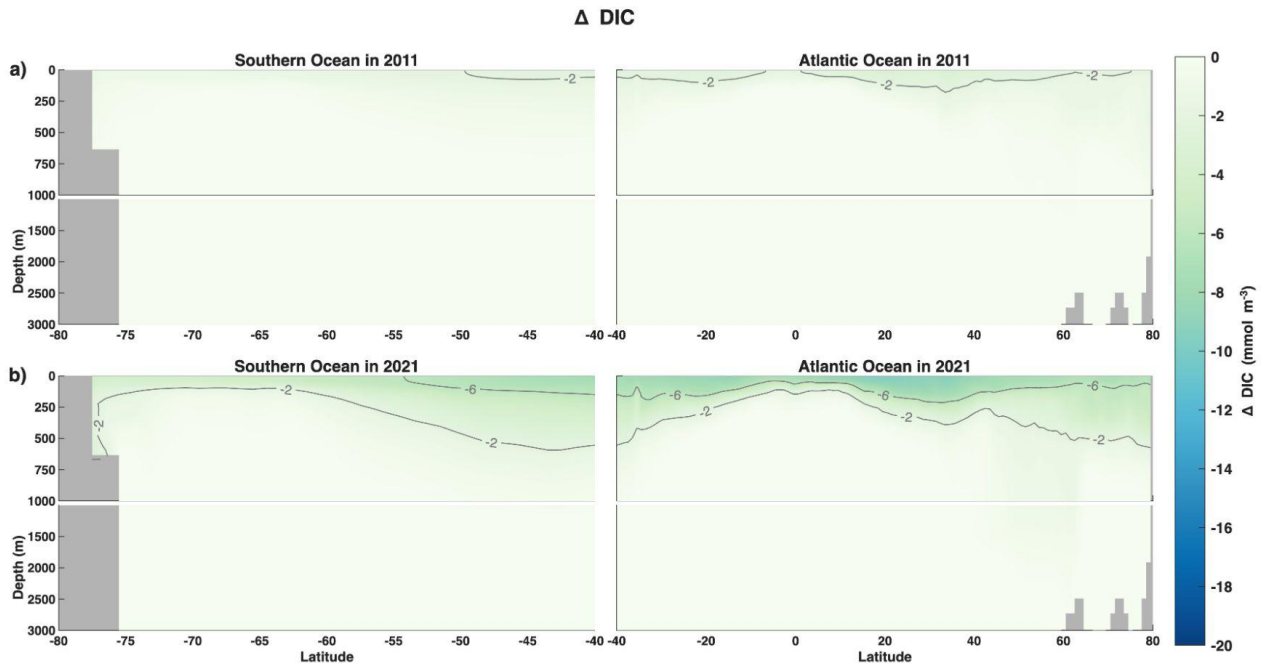

16  
 17 **Figure S2:** Southern Ocean and Atlantic basin-averaged zonal mean  $\Delta$ DIC concentration ( $\text{mmol m}^{-3}$ ) for SSP2 Mitigation minus Baseline. **a)** top panel shows changes in 2011 (11 years post  
 18 mitigation), **b)** bottom panel shows 2021, (the last year of the simulation). Negative values  
 19 (cooler colors) indicate more carbon accumulation in Baseline as compared to mitigation  
 20 scenarios.  
 21

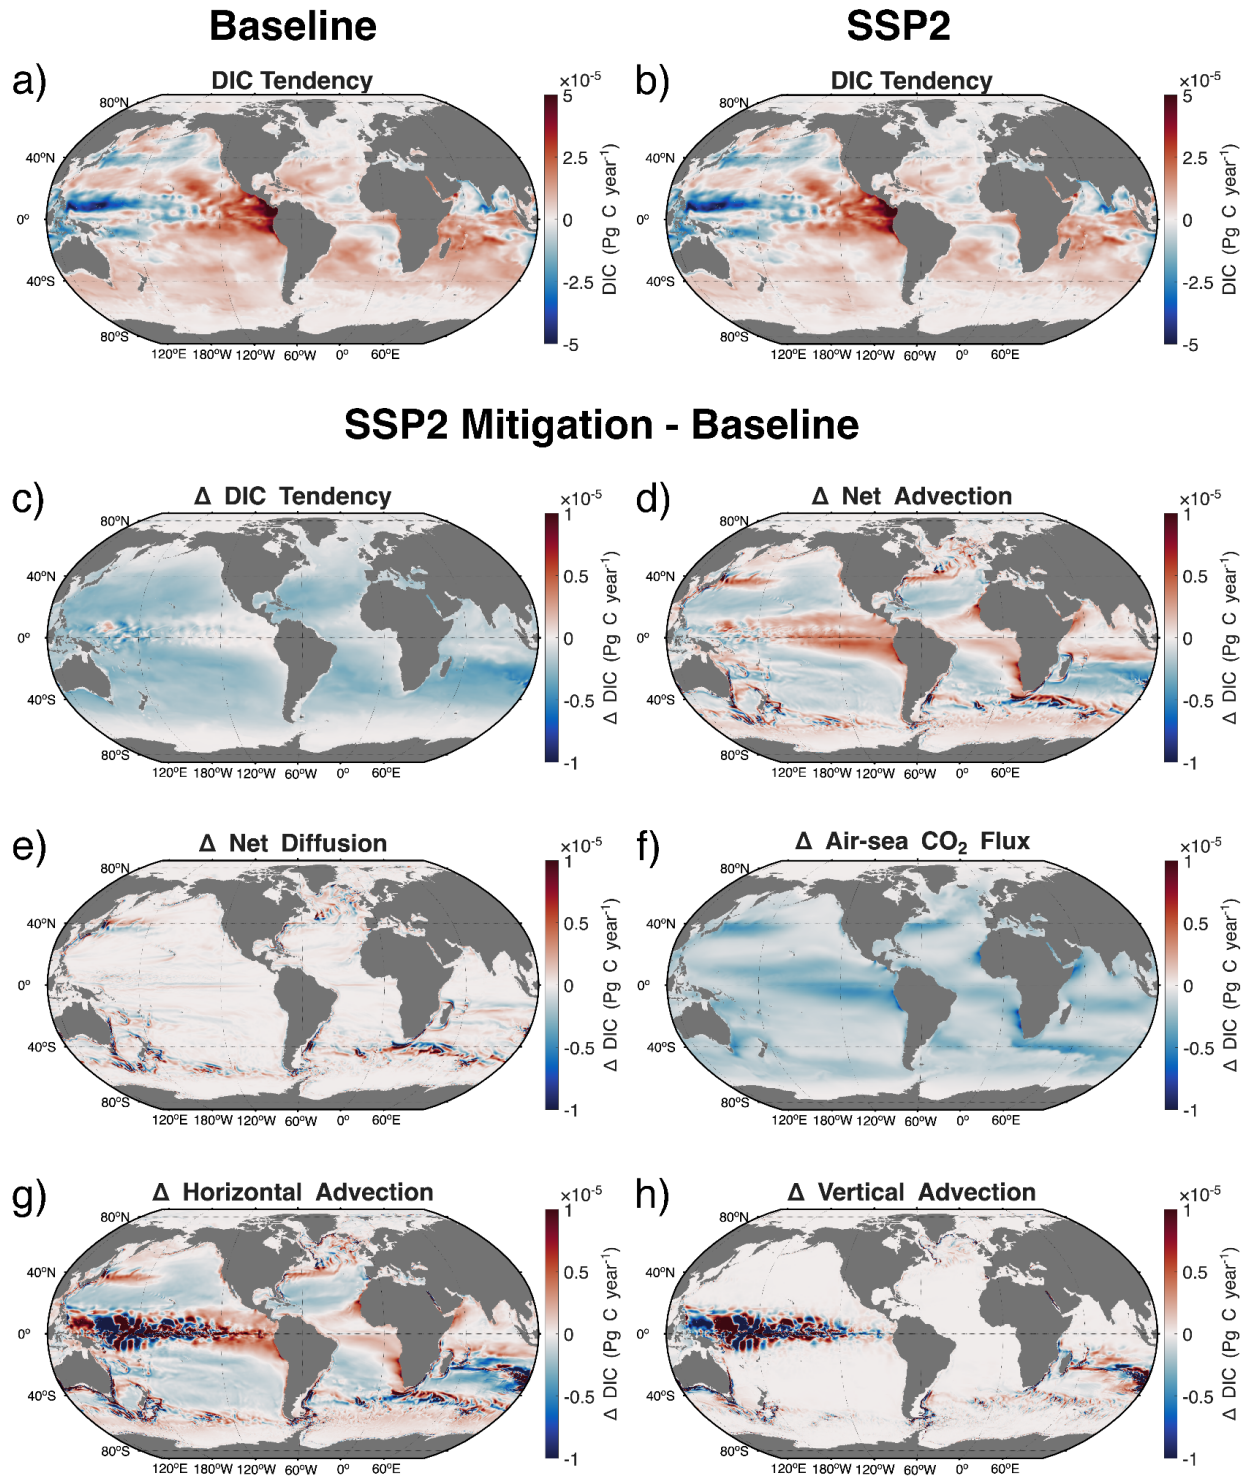

22  
 23 **Figure S3:** DIC budget. Time-mean (2016–2021) vertically integrated DIC tendency for **(a)**  
 24 Baseline and **(b)** SSP2 Mitigation. Differences in ECCO-Darwin DIC budget terms (SSP2  
 25 Mitigation – Baseline) for surface-to-500 m vertically integrated 2016–2021 mean DIC  
 26 tendency: **(c)** tendency, **(d)** net diffusion, **(e)** net advection, and **(f)** air-sea CO<sub>2</sub> flux. Net advection is  
 27 further decomposed into **(g)** horizontal and **(h)** vertical components.  
 28
